# Supplementary material
Source: publisher figshare collection journal article supplement (https://acs.figshare.com/ndownloader/files/5075950)
Supplement: Supplementary file 1 [file 5075950]

data_compound_10a
 
_audit_creation_method            SHELXL-97
_chemical_name_systematic
;
 LCCL01
;
_chemical_name_common             LCCL01
_chemical_melting_point           ?
_chemical_formula_moiety          'C26.50 H24 Au Cl2 P'
_chemical_formula_sum
 'C26.50 H24 Au Cl2 P'
_chemical_formula_weight          641.29
 
loop_
 _atom_type_symbol
 _atom_type_description
 _atom_type_scat_dispersion_real
 _atom_type_scat_dispersion_imag
 _atom_type_scat_source
 'C'  'C'   0.0033   0.0016
 'International Tables Vol C Tables 4.2.6.8 and 6.1.1.4'
 'H'  'H'   0.0000   0.0000
 'International Tables Vol C Tables 4.2.6.8 and 6.1.1.4'
 'P'  'P'   0.1023   0.0942
 'International Tables Vol C Tables 4.2.6.8 and 6.1.1.4'
 'Cl'  'Cl'   0.1484   0.1585
 'International Tables Vol C Tables 4.2.6.8 and 6.1.1.4'
 'Au'  'Au'  -2.0133   8.8022
 'International Tables Vol C Tables 4.2.6.8 and 6.1.1.4'
 
_symmetry_cell_setting            monoclinic
_symmetry_space_group_name_H-M    P21/n
 
loop_
 _symmetry_equiv_pos_as_xyz
 'x, y, z'
 '-x+1/2, y+1/2, -z+1/2'
 '-x, -y, -z'
 'x-1/2, -y-1/2, z-1/2'
 
_cell_length_a                    10.377(5)
_cell_length_b                    17.347(5)
_cell_length_c                    13.471(5)
_cell_angle_alpha                 90 
_cell_angle_beta                  91.769(5)
_cell_angle_gamma                 90 
_cell_volume                      2423.8(16)
_cell_formula_units_Z             4
_cell_measurement_temperature     293(2)
_cell_measurement_reflns_used     2.396
_cell_measurement_theta_min       2.396
_cell_measurement_theta_max       30.034
 
_exptl_crystal_description        Block
_exptl_crystal_colour             yellow
_exptl_crystal_size_max           0.35
_exptl_crystal_size_mid           0.35
_exptl_crystal_size_min           0.35
_exptl_crystal_density_meas       ?
_exptl_crystal_density_diffrn     1.757
_exptl_crystal_density_method     'not measured'
_exptl_crystal_F_000              1244
_exptl_absorpt_coefficient_mu     6.368
_exptl_absorpt_correction_type    none
_exptl_absorpt_correction_T_min   ?
_exptl_absorpt_correction_T_max   ?
_exptl_absorpt_process_details    ?
 
_exptl_special_details
;
 ?
;
 
_diffrn_ambient_temperature       293(2)
_diffrn_radiation_wavelength      0.71069
_diffrn_radiation_type            MoK\a
_diffrn_radiation_source          'fine-focus sealed tube'
_diffrn_radiation_monochromator   graphite
_diffrn_measurement_device_type   CCD
_diffrn_measurement_method        none
_diffrn_detector_area_resol_mean  ?
_diffrn_standards_number          ?
_diffrn_standards_interval_count  ?
_diffrn_standards_interval_time   ?
_diffrn_standards_decay_%         none
_diffrn_reflns_number             12868
_diffrn_reflns_av_R_equivalents   0.0353
_diffrn_reflns_av_sigmaI/netI     0.0461
_diffrn_reflns_limit_h_min        -14
_diffrn_reflns_limit_h_max        14
_diffrn_reflns_limit_k_min        -23
_diffrn_reflns_limit_k_max        24
_diffrn_reflns_limit_l_min        -18
_diffrn_reflns_limit_l_max        18
_diffrn_reflns_theta_min          2.44
_diffrn_reflns_theta_max          30.03
_reflns_number_total              7066
_reflns_number_gt                 5271
_reflns_threshold_expression      >2sigma(I)
 
_computing_data_collection        'Collect (Nonius BV, 1997-2000)'
_computing_cell_refinement        'HKL Scalepack (Otwinowski & Minor 1997)'
_computing_data_reduction         'HKL Denzo and Scalepack (Otwinowski & Minor)'
_computing_structure_solution     'SIR-97 (Altomare, 1997)'
_computing_structure_refinement   'SHELXL-97 (Sheldrick, 1997)'
_computing_molecular_graphics     'Ortep-3 for Windows (Farrugia, 1997)'
_computing_publication_material   'WinGX publication routines (Farrugia, 1999)'
 
_refine_special_details
;
 Refinement of F^2^ against ALL reflections.  The weighted R-factor wR and
 goodness of fit S are based on F^2^, conventional R-factors R are based
 on F, with F set to zero for negative F^2^. The threshold expression of
 F^2^ > 2sigma(F^2^) is used only for calculating R-factors(gt) etc. and is
 not relevant to the choice of reflections for refinement.  R-factors based
 on F^2^ are statistically about twice as large as those based on F, and R-
 factors based on ALL data will be even larger.
;
 
_refine_ls_structure_factor_coef  Fsqd
_refine_ls_matrix_type            full
_refine_ls_weighting_scheme       calc
_refine_ls_weighting_details
 'calc w=1/[\s^2^(Fo^2^)+(0.0397P)^2^+10.1150P] where P=(Fo^2^+2Fc^2^)/3'
_atom_sites_solution_primary      direct
_atom_sites_solution_secondary    difmap
_atom_sites_solution_hydrogens    geom
_refine_ls_hydrogen_treatment     mixed
_refine_ls_extinction_method      SHELXL
_refine_ls_extinction_coef        0.0049(3)
_refine_ls_extinction_expression
 'Fc^*^=kFc[1+0.001xFc^2^\l^3^/sin(2\q)]^-1/4^'
_refine_ls_number_reflns          7066
_refine_ls_number_parameters      285
_refine_ls_number_restraints      0
_refine_ls_R_factor_all           0.0701
_refine_ls_R_factor_gt            0.0461
_refine_ls_wR_factor_ref          0.1189
_refine_ls_wR_factor_gt           0.1074
_refine_ls_goodness_of_fit_ref    1.032
_refine_ls_restrained_S_all       1.032
_refine_ls_shift/su_max           1.638
_refine_ls_shift/su_mean          0.017
 
loop_
 _atom_site_label
 _atom_site_type_symbol
 _atom_site_fract_x
 _atom_site_fract_y
 _atom_site_fract_z
 _atom_site_U_iso_or_equiv
 _atom_site_adp_type
 _atom_site_occupancy
 _atom_site_symmetry_multiplicity
 _atom_site_calc_flag
 _atom_site_refinement_flags
 _atom_site_disorder_assembly
 _atom_site_disorder_group
C1 C 0.0692(6) 0.2630(4) 0.9967(5) 0.0477(13) Uani 1 1 d . . .
C2 C 0.1295(6) 0.2250(4) 1.0722(4) 0.0474(13) Uani 1 1 d . . .
C3 C 0.0841(8) 0.2223(5) 1.1773(5) 0.0666(19) Uani 1 1 d . . .
H3A H 0.0127 0.1864 1.1805 0.080 Uiso 1 1 calc R . .
H3B H 0.0525 0.2728 1.1953 0.080 Uiso 1 1 calc R . .
C4 C 0.1884(10) 0.1982(6) 1.2524(6) 0.081(3) Uani 1 1 d . . .
H4A H 0.2508 0.2395 1.2608 0.097 Uiso 1 1 calc R . .
H4B H 0.1502 0.1887 1.3161 0.097 Uiso 1 1 calc R . .
C5 C 0.2557(11) 0.1262(6) 1.2185(6) 0.091(3) Uani 1 1 d . . .
H5A H 0.1927 0.0858 1.2057 0.110 Uiso 1 1 calc R . .
H5B H 0.3155 0.1085 1.2704 0.110 Uiso 1 1 calc R . .
C6 C 0.3286(8) 0.1426(6) 1.1245(6) 0.072(2) Uani 1 1 d . . .
H6A H 0.4021 0.1752 1.1410 0.087 Uiso 1 1 calc R . .
H6B H 0.3611 0.0944 1.0986 0.087 Uiso 1 1 calc R . .
C7 C 0.2464(7) 0.1816(4) 1.0446(5) 0.0495(14) Uani 1 1 d . . .
C8 C 0.2701(6) 0.1819(4) 0.9469(5) 0.0471(13) Uani 1 1 d . . .
C9 C 0.3793(6) 0.1477(4) 0.8954(5) 0.0525(15) Uani 1 1 d . . .
C10 C 0.5061(8) 0.1590(6) 0.9304(8) 0.082(3) Uani 1 1 d . . .
H10 H 0.5222 0.1884 0.9872 0.099 Uiso 1 1 calc R . .
C11 C 0.6075(8) 0.1267(7) 0.8811(9) 0.100(3) Uani 1 1 d . . .
H11 H 0.6913 0.1349 0.9052 0.120 Uiso 1 1 calc R . .
C12 C 0.5878(9) 0.0834(6) 0.7989(9) 0.091(3) Uani 1 1 d . . .
H12 H 0.6569 0.0596 0.7689 0.109 Uiso 1 1 calc R . .
C13 C 0.4651(8) 0.0748(6) 0.7600(7) 0.079(2) Uani 1 1 d . . .
H13 H 0.4508 0.0472 0.7015 0.095 Uiso 1 1 calc R . .
C14 C 0.3620(7) 0.1076(5) 0.8083(6) 0.0652(19) Uani 1 1 d . . .
H14 H 0.2792 0.1023 0.7808 0.078 Uiso 1 1 calc R . .
C15 C -0.0469(6) 0.3121(4) 1.0005(5) 0.0537(16) Uani 1 1 d . . .
C16 C -0.1596(7) 0.2839(6) 1.0393(6) 0.071(2) Uani 1 1 d . . .
H16 H -0.1624 0.2331 1.0614 0.085 Uiso 1 1 calc R . .
C17 C -0.2684(8) 0.3299(7) 1.0459(7) 0.086(3) Uani 1 1 d . . .
H17 H -0.3430 0.3101 1.0727 0.104 Uiso 1 1 calc R . .
C18 C -0.2660(9) 0.4046(7) 1.0131(7) 0.091(3) Uani 1 1 d . . .
H18 H -0.3383 0.4357 1.0188 0.109 Uiso 1 1 calc R . .
C19 C -0.1558(10) 0.4337(6) 0.9715(7) 0.084(3) Uani 1 1 d . . .
H19 H -0.1544 0.4840 0.9477 0.101 Uiso 1 1 calc R . .
C20 C -0.0465(8) 0.3869(5) 0.9655(6) 0.0645(18) Uani 1 1 d . . .
H20 H 0.0275 0.4065 0.9375 0.077 Uiso 1 1 calc R . .
C21 C 0.2289(6) 0.3210(3) 0.8344(5) 0.0454(13) Uani 1 1 d . . .
C22 C 0.3280(7) 0.3564(5) 0.8907(6) 0.0618(17) Uani 1 1 d . . .
H22 H 0.3515 0.3378 0.9534 0.074 Uiso 1 1 calc R . .
C23 C 0.3909(8) 0.4198(5) 0.8513(7) 0.074(2) Uani 1 1 d . . .
H23 H 0.4579 0.4428 0.8879 0.089 Uiso 1 1 calc R . .
C24 C -0.1433(9) 0.0515(5) 1.2607(8) 0.079(2) Uani 1 1 d . . .
H24 H -0.1009 0.0087 1.2358 0.095 Uiso 1 1 calc R . .
C25 C -0.2416(9) 0.0862(5) 1.2058(7) 0.080(2) Uani 1 1 d . . .
H25 H -0.2653 0.0666 1.1437 0.096 Uiso 1 1 calc R . .
C26 C 0.1947(7) 0.3501(5) 0.7420(5) 0.0603(17) Uani 1 1 d . . .
H26 H 0.1289 0.3270 0.7041 0.072 Uiso 1 1 calc R . .
P1 P 0.14717(14) 0.23824(10) 0.88344(11) 0.0443(3) Uani 1 1 d . . .
Cl1 Cl -0.10109(18) 0.11015(14) 0.65748(14) 0.0723(5) Uani 1 1 d . . .
Au1 Au 0.02108(2) 0.176537(15) 0.772551(18) 0.04638(10) Uani 1 1 d . . .
C50 C 0.124(3) 0.0081(15) 0.0178(18) 0.107(9) Uani 0.50 1 d P . .
Cl51 Cl 0.0870(8) -0.0497(5) 0.0418(5) 0.251(4) Uani 1 1 d . . .
H50 H 0.028(4) 0.030(2) 0.004(3) 0.000(8) Uiso 1 1 d . . .
 
loop_
 _atom_site_aniso_label
 _atom_site_aniso_U_11
 _atom_site_aniso_U_22
 _atom_site_aniso_U_33
 _atom_site_aniso_U_23
 _atom_site_aniso_U_13
 _atom_site_aniso_U_12
C1 0.043(3) 0.055(4) 0.045(3) -0.002(3) 0.000(2) -0.002(3)
C2 0.050(3) 0.054(4) 0.038(3) -0.002(3) -0.005(2) -0.006(3)
C3 0.077(5) 0.079(5) 0.044(4) 0.002(3) 0.003(3) -0.014(4)
C4 0.098(7) 0.099(7) 0.043(4) 0.009(4) -0.012(4) -0.010(5)
C5 0.118(8) 0.100(7) 0.055(5) 0.024(5) -0.005(5) 0.015(6)
C6 0.072(5) 0.089(6) 0.055(4) 0.017(4) -0.016(4) 0.009(4)
C7 0.056(4) 0.052(4) 0.040(3) 0.002(3) -0.010(2) -0.003(3)
C8 0.045(3) 0.054(4) 0.042(3) 0.003(3) -0.008(2) 0.000(3)
C9 0.040(3) 0.056(4) 0.062(4) 0.008(3) -0.002(3) 0.003(3)
C10 0.049(4) 0.111(7) 0.086(6) 0.001(5) -0.011(4) 0.013(4)
C11 0.047(4) 0.128(9) 0.126(9) 0.023(8) 0.000(5) 0.022(5)
C12 0.068(6) 0.085(7) 0.122(9) 0.014(6) 0.030(5) 0.026(5)
C13 0.072(5) 0.080(6) 0.085(6) -0.009(5) 0.018(4) 0.007(4)
C14 0.050(4) 0.069(5) 0.077(5) -0.003(4) 0.006(3) 0.008(3)
C15 0.043(3) 0.075(5) 0.042(3) -0.018(3) -0.001(2) 0.003(3)
C16 0.058(4) 0.086(6) 0.070(5) -0.015(4) 0.010(4) -0.005(4)
C17 0.052(4) 0.128(9) 0.080(6) -0.041(6) 0.012(4) 0.002(5)
C18 0.071(5) 0.125(9) 0.076(6) -0.051(6) -0.013(4) 0.029(6)
C19 0.095(7) 0.081(6) 0.074(6) -0.014(5) -0.013(5) 0.031(5)
C20 0.064(4) 0.068(5) 0.061(4) -0.004(4) 0.000(3) 0.010(4)
C21 0.040(3) 0.047(3) 0.050(3) -0.001(3) 0.002(2) 0.004(2)
C22 0.059(4) 0.063(4) 0.063(4) -0.004(4) -0.009(3) -0.004(3)
C23 0.061(4) 0.064(5) 0.098(6) -0.008(4) -0.009(4) -0.009(4)
C24 0.070(5) 0.053(4) 0.115(8) -0.010(5) 0.015(5) 0.006(4)
C25 0.096(6) 0.073(5) 0.072(5) -0.024(4) 0.003(4) 0.005(5)
C26 0.061(4) 0.062(4) 0.057(4) 0.008(3) -0.007(3) 0.002(3)
P1 0.0385(7) 0.0542(9) 0.0399(8) 0.0003(6) -0.0022(5) 0.0014(6)
Cl1 0.0571(9) 0.0979(15) 0.0610(10) -0.0179(10) -0.0115(8) -0.0117(10)
Au1 0.03838(13) 0.05744(17) 0.04307(14) -0.00203(10) -0.00276(8) 0.00064(10)
C50 0.118(18) 0.107(17) 0.095(15) -0.040(13) -0.013(13) -0.075(16)
Cl51 0.259(7) 0.280(8) 0.216(6) 0.102(6) 0.032(5) 0.151(7)
 
_geom_special_details
;
 All esds (except the esd in the dihedral angle between two l.s. planes)
 are estimated using the full covariance matrix.  The cell esds are taken
 into account individually in the estimation of esds in distances, angles
 and torsion angles; correlations between esds in cell parameters are only
 used when they are defined by crystal symmetry.  An approximate (isotropic)
 treatment of cell esds is used for estimating esds involving l.s. planes.
;
 
loop_
 _geom_bond_atom_site_label_1
 _geom_bond_atom_site_label_2
 _geom_bond_distance
 _geom_bond_site_symmetry_2
 _geom_bond_publ_flag
C1 C2 1.350(9) . ?
C1 C15 1.477(9) . ?
C1 P1 1.801(6) . ?
C2 C7 1.484(9) . ?
C2 C3 1.507(9) . ?
C3 C4 1.517(11) . ?
C4 C5 1.508(14) . ?
C5 C6 1.523(12) . ?
C6 C7 1.513(9) . ?
C7 C8 1.346(9) . ?
C8 C9 1.472(9) . ?
C8 P1 1.802(6) . ?
C9 C14 1.370(10) . ?
C9 C10 1.398(10) . ?
C10 C11 1.380(13) . ?
C11 C12 1.349(15) . ?
C12 C13 1.370(14) . ?
C13 C14 1.392(10) . ?
C15 C20 1.380(11) . ?
C15 C16 1.386(10) . ?
C16 C17 1.388(12) . ?
C17 C18 1.369(15) . ?
C18 C19 1.385(14) . ?
C19 C20 1.399(11) . ?
C21 C26 1.379(9) . ?
C21 C22 1.400(9) . ?
C21 P1 1.804(6) . ?
C22 C23 1.393(11) . ?
C23 C24 1.355(13) 4_665 ?
C24 C23 1.355(13) 4_566 ?
C24 C25 1.380(13) . ?
C25 C26 1.384(11) 4_566 ?
C26 C25 1.384(11) 4_665 ?
P1 Au1 2.2290(16) . ?
Cl1 Au1 2.2836(18) . ?
C50 Cl51 1.12(2) . ?
 
loop_
 _geom_angle_atom_site_label_1
 _geom_angle_atom_site_label_2
 _geom_angle_atom_site_label_3
 _geom_angle
 _geom_angle_site_symmetry_1
 _geom_angle_site_symmetry_3
 _geom_angle_publ_flag
C2 C1 C15 128.0(6) . . ?
C2 C1 P1 108.2(5) . . ?
C15 C1 P1 123.7(5) . . ?
C1 C2 C7 115.0(6) . . ?
C1 C2 C3 124.9(6) . . ?
C7 C2 C3 120.1(6) . . ?
C2 C3 C4 113.5(7) . . ?
C5 C4 C3 110.7(7) . . ?
C4 C5 C6 110.1(8) . . ?
C7 C6 C5 113.1(7) . . ?
C8 C7 C2 114.8(6) . . ?
C8 C7 C6 125.5(7) . . ?
C2 C7 C6 119.7(6) . . ?
C7 C8 C9 128.8(6) . . ?
C7 C8 P1 108.5(5) . . ?
C9 C8 P1 122.6(5) . . ?
C14 C9 C10 117.2(7) . . ?
C14 C9 C8 121.7(6) . . ?
C10 C9 C8 121.0(7) . . ?
C11 C10 C9 120.3(10) . . ?
C12 C11 C10 121.5(9) . . ?
C11 C12 C13 119.3(8) . . ?
C12 C13 C14 119.7(9) . . ?
C9 C14 C13 121.7(8) . . ?
C20 C15 C16 118.2(7) . . ?
C20 C15 C1 121.2(6) . . ?
C16 C15 C1 120.5(7) . . ?
C15 C16 C17 121.2(9) . . ?
C18 C17 C16 120.1(9) . . ?
C17 C18 C19 120.0(9) . . ?
C18 C19 C20 119.5(10) . . ?
C15 C20 C19 121.0(8) . . ?
C26 C21 C22 119.6(7) . . ?
C26 C21 P1 120.7(5) . . ?
C22 C21 P1 119.7(5) . . ?
C23 C22 C21 119.0(7) . . ?
C24 C23 C22 121.4(8) 4_665 . ?
C23 C24 C25 119.4(8) 4_566 . ?
C24 C25 C26 120.9(8) . 4_566 ?
C21 C26 C25 119.8(7) . 4_665 ?
C8 P1 C1 93.3(3) . . ?
C8 P1 C21 105.8(3) . . ?
C1 P1 C21 110.4(3) . . ?
C8 P1 Au1 116.7(2) . . ?
C1 P1 Au1 114.4(2) . . ?
C21 P1 Au1 114.2(2) . . ?
P1 Au1 Cl1 177.64(7) . . ?
 
_diffrn_measured_fraction_theta_max    0.997
_diffrn_reflns_theta_full              30.03
_diffrn_measured_fraction_theta_full   0.997
_refine_diff_density_max    1.483
_refine_diff_density_min   -1.428
_refine_diff_density_rms    0.128
 
#==END

 
 
